# Supplementary material for: How Important Is ‘Accuracy’ of Surrogate Decision-Making for Research Participation?
Source: PubMed Central journal article supplement (PMC3561414; doi:10.1371/journal.pone.0054790), 2013-01-31
Supplement: pone.0054790.s002.pdf [file pone.0054790.s002.pdf]

|                 | <b>Table S1.</b> Distribution of willingness to participate in research (self-perspective) and to grant leeway to family member in making research decisions if respondent is unable to make decision for self, measured at three time points. |                     |                     |               |               |                     |                     |                     |               |               |                     |                     |                     |               |               |
|-----------------|------------------------------------------------------------------------------------------------------------------------------------------------------------------------------------------------------------------------------------------------|---------------------|---------------------|---------------|---------------|---------------------|---------------------|---------------------|---------------|---------------|---------------------|---------------------|---------------------|---------------|---------------|
|                 | DD Group                                                                                                                                                                                                                                       |                     |                     |               |               | Education Group     |                     |                     |               |               | Control Group       |                     |                     |               |               |
|                 | Survey 1<br>(n=212)                                                                                                                                                                                                                            | Survey 2<br>(n=173) | Survey 3<br>(n=168) | Survey<br>1v2 | Survey<br>1v3 | Survey 1<br>(n=141) | Survey 2<br>(n=129) | Survey 3<br>(n=128) | Survey<br>1v2 | Survey<br>1v3 | Survey 1<br>(n=150) | Survey 2<br>(n=140) | Survey 3<br>(n=143) | Survey<br>1v2 | Survey<br>1v3 |
| Lumbar Puncture | %                                                                                                                                                                                                                                              | %                   | %                   | p-value       | p-value       | %                   | %                   | %                   | p-value       | p-value       | %                   | %                   | %                   | p-value       | p-value       |
| Definitely Not  | 6.1                                                                                                                                                                                                                                            | 2.3                 | 0.6                 | 0.001         | 0.092         | 7.8                 | 4.7                 | 8.6                 | 0.558         | 0.395         | 2.7                 | 2.9                 | 2.1                 | 0.666         | 0.552         |
| Probably Not    | 8.0                                                                                                                                                                                                                                            | 4.0                 | 9.5                 |               |               | 11.3                | 14.0                | 12.5                |               |               | 12.7                | 10.0                | 16.8                |               |               |
| Probably Yes    | 41.5                                                                                                                                                                                                                                           | 30.6                | 36.3                |               |               | 39.7                | 43.4                | 45.3                |               |               | 46.0                | 53.6                | 48.3                |               |               |
| Definitely Yes  | 43.9                                                                                                                                                                                                                                           | 62.4                | 53.0                |               |               | 40.4                | 37.2                | 33.6                |               |               | 38.0                | 32.9                | 30.8                |               |               |
| No Leeway       | 30.2                                                                                                                                                                                                                                           | 23.1                | 23.8                | 0.147         | 0.331         | 30.5                | 29.5                | 35.9                | 0.385         | 0.514         | 28.7                | 29.3                | 30.1                | 0.682         | 0.537         |
| Some Leeway     | 53.3                                                                                                                                                                                                                                           | 54.9                | 58.9                |               |               | 54.6                | 51.2                | 49.2                |               |               | 56.0                | 57.9                | 57.3                |               |               |
| Complete Leeway | 14.6                                                                                                                                                                                                                                           | 20.8                | 17.3                |               |               | 14.2                | 18.6                | 14.8                |               |               | 14.7                | 11.4                | 9.8                 |               |               |
| New Drug RCT    | %                                                                                                                                                                                                                                              | %                   | %                   | p-value       | p-value       | %                   | %                   | %                   | p-value       | p-value       | %                   | %                   | %                   | p-value       | p-value       |
| Definitely Not  | 1.9                                                                                                                                                                                                                                            | 1.2                 | 0.6                 | 0.250         | 0.554         | 2.8                 | 3.9                 | 4.7                 | 0.379         | 0.058         | 3.3                 | 3.6                 | 0.7                 | 0.793         | 0.257         |
| Probably Not    | 2.4                                                                                                                                                                                                                                            | 2.3                 | 3.0                 |               |               | 5.0                 | 7.0                 | 7.8                 |               |               | 8.7                 | 9.3                 | 9.1                 |               |               |
| Probably Yes    | 40.6                                                                                                                                                                                                                                           | 31.8                | 36.3                |               |               | 43.3                | 48.1                | 50.0                |               |               | 48.0                | 47.9                | 55.2                |               |               |
| Definitely Yes  | 55.2                                                                                                                                                                                                                                           | 64.7                | 59.5                |               |               | 48.9                | 40.3                | 37.5                |               |               | 40.0                | 39.3                | 34.3                |               |               |
| No Leeway       | 27.4                                                                                                                                                                                                                                           | 25.4                | 23.8                | 0.554         | 0.172         | 30.5                | 28.7                | 29.7                | 0.387         | 0.443         | 29.3                | 22.9                | 25.2                | 0.390         | 0.771         |
| Some Leeway     | 54.7                                                                                                                                                                                                                                           | 54.3                | 56.5                |               |               | 53.2                | 49.6                | 54.7                |               |               | 57.3                | 64.3                | 61.5                |               |               |
| Complete Leeway | 17.0                                                                                                                                                                                                                                           | 20.2                | 19.6                |               |               | 16.3                | 21.7                | 15.6                |               |               | 12.7                | 12.9                | 11.9                |               |               |
| Vaccine         | %                                                                                                                                                                                                                                              | %                   | %                   | p-value       | p-value       | %                   | %                   | %                   | p-value       | p-value       | %                   | %                   | %                   | p-value       | p-value       |
| Definitely Not  | 12.7                                                                                                                                                                                                                                           | 10.4                | 6.0                 | 0.006         | 0.005         | 20.6                | 18.6                | 20.3                | 0.470         | 0.923         | 15.3                | 17.1                | 9.8                 | 0.162         | 0.087         |
| Probably Not    | 29.7                                                                                                                                                                                                                                           | 19.1                | 20.8                |               |               | 27.7                | 20.9                | 24.2                |               |               | 30.0                | 26.4                | 30.1                |               |               |
| Probably Yes    | 38.7                                                                                                                                                                                                                                           | 40.5                | 44.6                |               |               | 32.6                | 38.8                | 37.5                |               |               | 42.0                | 39.3                | 43.4                |               |               |
| Definitely Yes  | 18.4                                                                                                                                                                                                                                           | 29.5                | 27.4                |               |               | 19.1                | 20.9                | 18.0                |               |               | 12.0                | 15.7                | 16.8                |               |               |
| No Leeway       | 35.8                                                                                                                                                                                                                                           | 31.2                | 23.2                | 0.003         | 0.007         | 41.1                | 35.7                | 42.2                | 0.649         | 0.490         | 36.0                | 39.3                | 29.4                | 0.092         | 0.152         |
| Some Leeway     | 53.8                                                                                                                                                                                                                                           | 48.6                | 61.3                |               |               | 47.5                | 48.8                | 42.2                |               |               | 54.7                | 48.6                | 57.3                |               |               |
| Complete Leeway | 8.5                                                                                                                                                                                                                                            | 19.7                | 14.9                |               |               | 11.3                | 15.5                | 15.6                |               |               | 8.0                 | 10.7                | 11.9                |               |               |
| Gene Transfer   | %                                                                                                                                                                                                                                              | %                   | %                   | p-value       | p-value       | %                   | %                   | %                   | p-value       | p-value       | %                   | %                   | %                   | p-value       | p-value       |
| Definitely Not  | 17.9                                                                                                                                                                                                                                           | 20.2                | 17.3                | 0.005         | 0.005         | 28.4                | 27.1                | 28.9                | 0.062         | 0.397         | 22.7                | 27.1                | 23.1                | 0.794         | 0.857         |
| Probably Not    | 31.1                                                                                                                                                                                                                                           | 26.0                | 22.6                |               |               | 29.1                | 20.2                | 25.0                |               |               | 29.3                | 27.9                | 30.1                |               |               |
| Probably Yes    | 40.1                                                                                                                                                                                                                                           | 32.9                | 37.5                |               |               | 27.7                | 38.0                | 33.6                |               |               | 36.7                | 35.7                | 35.7                |               |               |
| Definitely Yes  | 10.8                                                                                                                                                                                                                                           | 20.8                | 22.0                |               |               | 14.9                | 14.7                | 12.5                |               |               | 10.7                | 9.3                 | 11.2                |               |               |
| No Leeway       | 36.8                                                                                                                                                                                                                                           | 38.7                | 28.6                | 0.074         | 0.013         | 48.2                | 45.7                | 46.1                | 0.791         | 0.855         | 45.3                | 47.1                | 43.4                | 0.387         | 0.835         |
| Some Leeway     | 52.4                                                                                                                                                                                                                                           | 45.7                | 51.8                |               |               | 41.1                | 40.3                | 39.1                |               |               | 46.0                | 40.7                | 46.2                |               |               |
| Complete Leeway | 10.4                                                                                                                                                                                                                                           | 15.0                | 19.6                |               |               | 10.6                | 14.0                | 14.1                |               |               | 8.0                 | 11.4                | 9.8                 |               |               |

The p-values are based on asymptotic symmetry test for paired data, each with multiple discrete response levels (STATA command, "symmetry"). Some percentages do not add to 100 because not all participants answered the question.
