# Supplementary material for: How Important Is ‘Accuracy’ of Surrogate Decision-Making for Research Participation?
Source: PubMed Central journal article supplement (PMC3561414; doi:10.1371/journal.pone.0054790), 2013-01-31
Supplement: pone.0054790.s003.pdf [file pone.0054790.s003.pdf]

| Research Scenario | Table S2. Distribution of willingness to give permission for a loved one to participate in research (surrogate perspective), by study arm, measured at three time points. |                     |                     |               |               |                     |                     |                     |               |               |                     |                     |                     |               |               |
|-------------------|---------------------------------------------------------------------------------------------------------------------------------------------------------------------------|---------------------|---------------------|---------------|---------------|---------------------|---------------------|---------------------|---------------|---------------|---------------------|---------------------|---------------------|---------------|---------------|
|                   | DD Group                                                                                                                                                                  |                     |                     |               |               | Education Group     |                     |                     |               |               | Control Group       |                     |                     |               |               |
|                   | Survey 1<br>(n=212)                                                                                                                                                       | Survey 2<br>(n=173) | Survey 3<br>(n=168) | Survey<br>1v2 | Survey<br>1v3 | Survey 1<br>(n=141) | Survey 2<br>(n=129) | Survey 3<br>(n=128) | Survey<br>1v2 | Survey<br>1v3 | Survey 1<br>(n=150) | Survey 2<br>(n=140) | Survey 3<br>(n=143) | Survey<br>1v2 | Survey<br>1v3 |
| Lumbar Puncture   | %                                                                                                                                                                         | %                   | %                   | p-value       | p-value       | %                   | %                   | %                   | p-value       | p-value       | %                   | %                   | %                   | p-value       | p-value       |
| Definitely Not    | 8.0                                                                                                                                                                       | 1.2                 | 3.0                 | 0.000         | 0.060         | 7.8                 | 7.0                 | 10.2                | 0.309         | 0.461         | 7.3                 | 7.1                 | 5.6                 | 0.667         | 0.387         |
| Probably Not      | 11.8                                                                                                                                                                      | 8.1                 | 9.5                 |               |               | 18.4                | 15.5                | 19.5                |               |               | 14.0                | 19.3                | 20.3                |               |               |
| Probably Yes      | 57.1                                                                                                                                                                      | 48.0                | 61.3                |               |               | 56.0                | 56.6                | 52.3                |               |               | 56.0                | 52.1                | 49.7                |               |               |
| Definitely Yes    | 22.6                                                                                                                                                                      | 42.2                | 26.2                |               |               | 17.7                | 20.2                | 17.2                |               |               | 22.0                | 20.0                | 20.3                |               |               |
| New Drug RCT      | %                                                                                                                                                                         | %                   | %                   | p-value       | p-value       | %                   | %                   | %                   | p-value       | p-value       | %                   | %                   | %                   | p-value       | p-value       |
| Definitely Not    | 1.4                                                                                                                                                                       | 1.7                 | 1.8                 | 0.421         | 0.884         | 3.5                 | 4.7                 | 4.7                 | 0.932         | 0.619         | 4.7                 | 5.7                 | 2.8                 | 0.460         | 0.370         |
| Probably Not      | 4.7                                                                                                                                                                       | 3.5                 | 4.2                 |               |               | 10.6                | 10.1                | 12.5                |               |               | 8.0                 | 10.0                | 11.2                |               |               |
| Probably Yes      | 59.9                                                                                                                                                                      | 49.7                | 59.5                |               |               | 58.9                | 59.7                | 59.4                |               |               | 56.7                | 60.7                | 60.1                |               |               |
| Definitely Yes    | 34.0                                                                                                                                                                      | 45.1                | 34.5                |               |               | 26.2                | 25.6                | 22.7                |               |               | 30.0                | 22.1                | 23.1                |               |               |
| Vaccine           | %                                                                                                                                                                         | %                   | %                   | p-value       | p-value       | %                   | %                   | %                   | p-value       | p-value       | %                   | %                   | %                   | p-value       | p-value       |
| Definitely Not    | 12.7                                                                                                                                                                      | 11.0                | 8.3                 | 0.017         | 0.002         | 19.9                | 17.8                | 25.0                | 0.109         | 0.011         | 14.7                | 21.4                | 14.7                | 0.409         | 0.973         |
| Probably Not      | 34.9                                                                                                                                                                      | 24.9                | 27.4                |               |               | 32.6                | 24.0                | 22.7                |               |               | 34.0                | 31.4                | 31.5                |               |               |
| Probably Yes      | 42.5                                                                                                                                                                      | 46.8                | 50.6                |               |               | 34.0                | 45.7                | 43.8                |               |               | 42.7                | 39.3                | 46.2                |               |               |
| Definitely Yes    | 9.4                                                                                                                                                                       | 16.8                | 13.7                |               |               | 11.3                | 10.9                | 8.6                 |               |               | 6.7                 | 6.4                 | 7.0                 |               |               |
| Gene Transfer     | %                                                                                                                                                                         | %                   | %                   | p-value       | p-value       | %                   | %                   | %                   | p-value       | p-value       | %                   | %                   | %                   | p-value       | p-value       |
| Definitely Not    | 21.7                                                                                                                                                                      | 26.6                | 18.5                | 0.009         | 0.247         | 27.7                | 27.1                | 28.9                | 0.005         | 0.524         | 25.3                | 33.6                | 30.1                | 0.266         | 0.449         |
| Probably Not      | 33.5                                                                                                                                                                      | 25.4                | 30.4                |               |               | 37.6                | 25.6                | 31.3                |               |               | 31.3                | 28.6                | 29.4                |               |               |
| Probably Yes      | 37.7                                                                                                                                                                      | 37.0                | 39.9                |               |               | 29.1                | 38.8                | 33.6                |               |               | 38.0                | 32.9                | 35.0                |               |               |
| Definitely Yes    | 5.7                                                                                                                                                                       | 11.0                | 10.7                |               |               | 4.3                 | 8.5                 | 5.5                 |               |               | 4.7                 | 5.0                 | 4.9                 |               |               |

The p-values are based on asymptotic symmetry test for paired data, each with multiple discrete response levels (STATA command, "symmetry"). Some percentages do not add to 100 because not all participants answered the question.
